# Supplementary material for: Insight into physico-chemical properties of oxalatoborate-based ionic liquids through combined experimental-theoretical characterization
Source: Royal Society of Chemistry journal article supplement (doi:10.1039/d4cp02296c), 2024-01-01
Supplement: d4cp02296c1.pdf [file d4cp02296c1.pdf]

# Supporting Information

## Insight into Physico-Chemical Properties of Oxalateborate-Based Ionic Liquids through Combined Experimental-Theoretical Characterization

Matteo Palluzzi<sup>[a]</sup>, Giorgia Mannucci<sup>[a]</sup>, Akiko Tsurumaki<sup>[a,b]</sup>, Matteo Busato<sup>[a]</sup>, Maria Assunta Navarra<sup>\*,[a,b]</sup>, Paola D'Angelo<sup>\*,[a]</sup>

<sup>a</sup> Department of Chemistry, Sapienza University of Rome, P.le A. Moro 5, 00185, Rome, Italy.

<sup>b</sup> Hydro-Eco Research Center, Sapienza University of Rome, Via A. Scarpa 16, 00161 Rome, Italy.

E-mail: [mariassunta.navarra@uniroma1.it](mailto:mariassunta.navarra@uniroma1.it)

E-mail: [p.dangelo@uniroma1.it](mailto:p.dangelo@uniroma1.it)

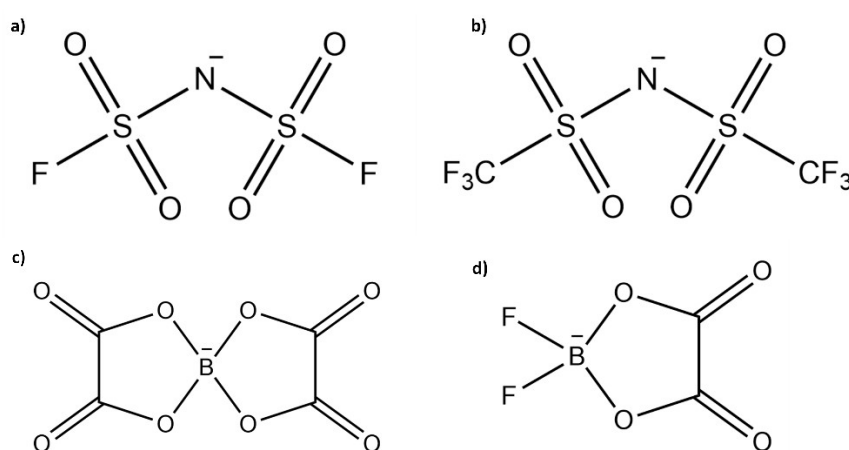

**Fig. S1** Structure of a) FSI, b) TFSI, c) BOB, d) DFOB anions.

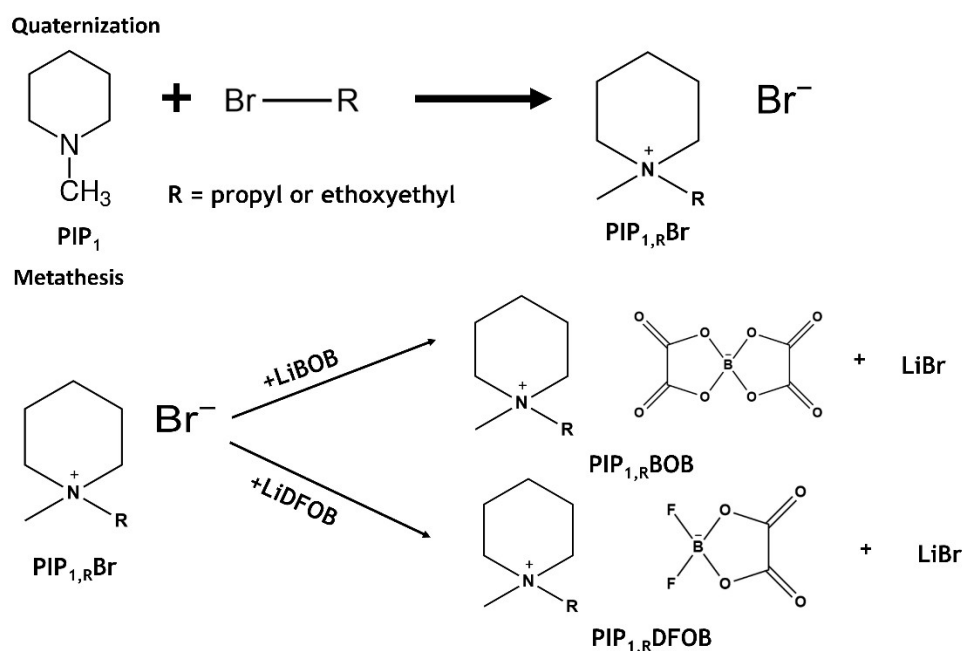

**Fig. S2** Schematic representation of the IL synthesis.

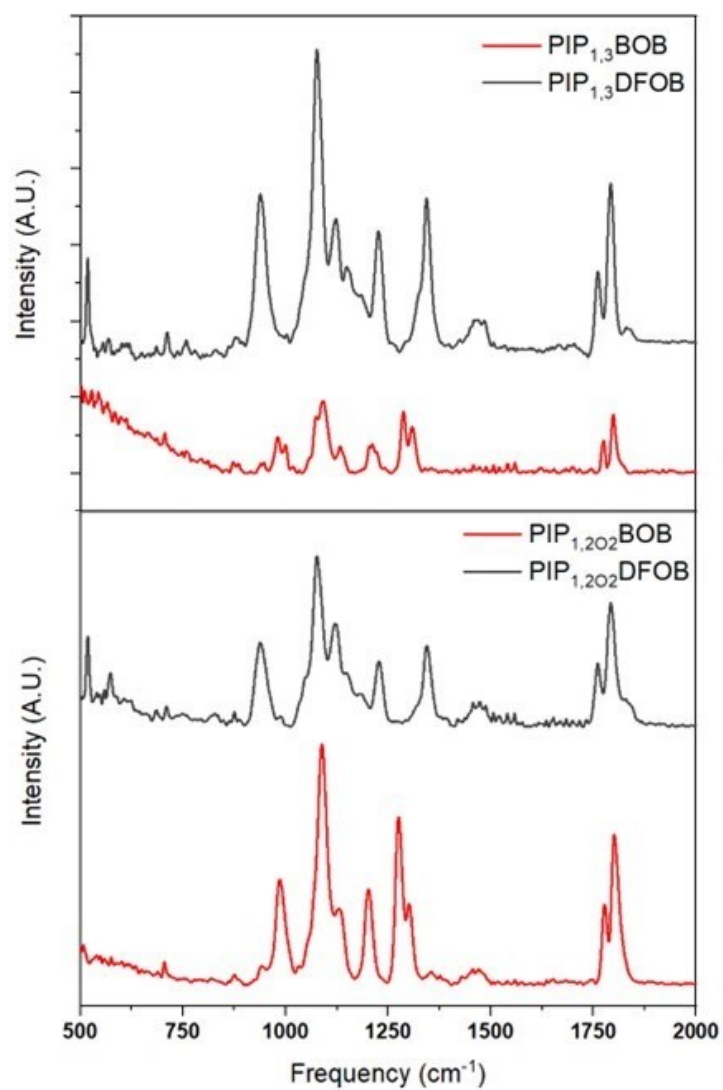

**Fig. S3** ATR-FTIR spectra of the four ILs.

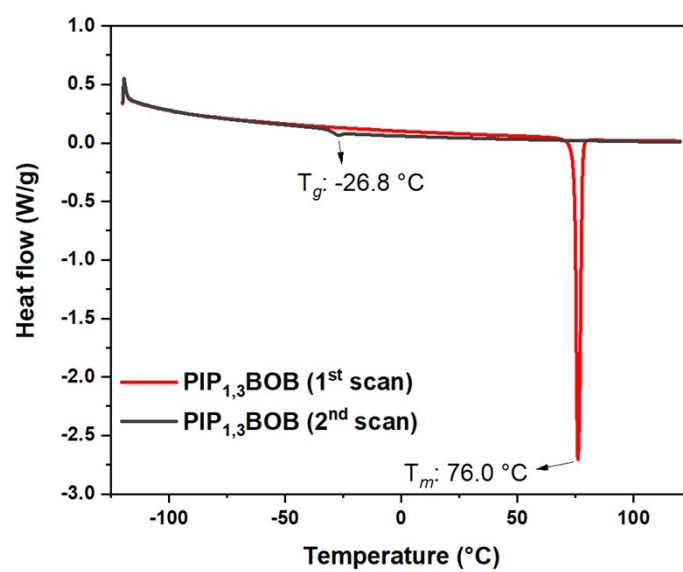

**Fig. S4** DSC curves of PIP<sub>1,3</sub>BOB.

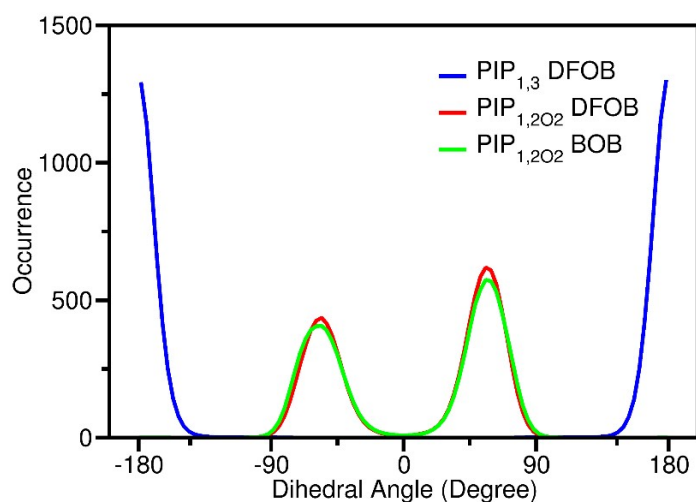

**Fig. S5** Dihedral angle distribution function of PIP<sub>1,3</sub> DFOB, PIP<sub>1,2O2</sub> DFOB, and PIP<sub>1,2O2</sub> BOB obtained from the MD simulations. The referred dihedral angles are the ones reported in **Fig. S6**.

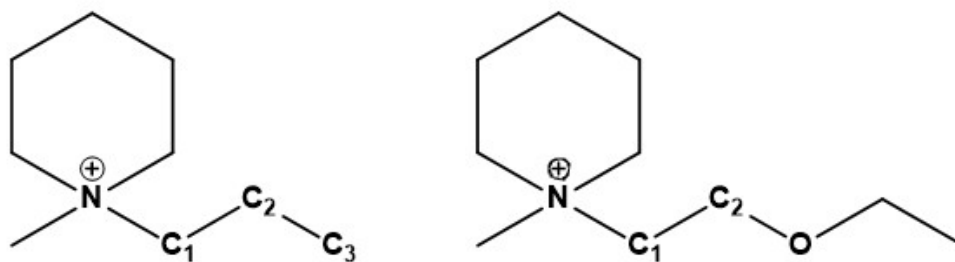

**Fig. S6** Structures of the PIP<sub>1,3</sub> and PIP<sub>1,2O2</sub> cations with highlighted the atoms forming the dihedral angles employed for the distributions shown in **Fig. S5**.

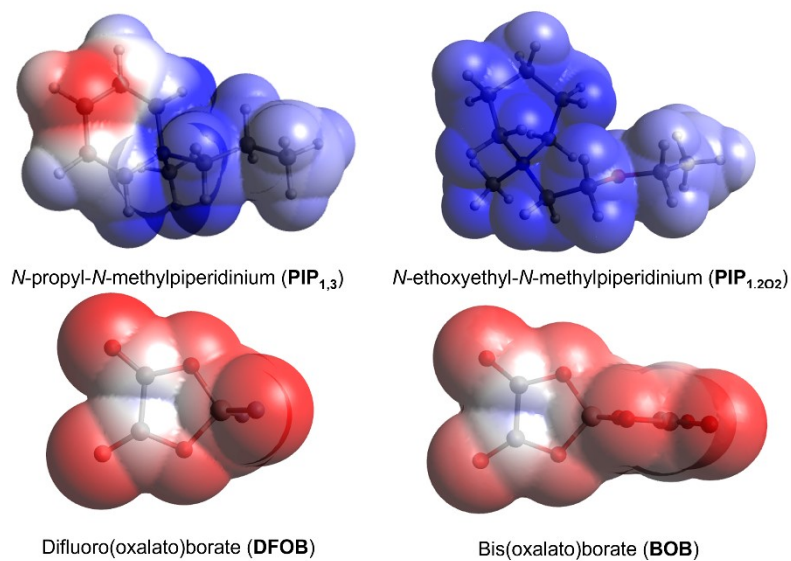

**Fig. S7** Electrostatic potential maps calculated from DFT optimizations of the isolated PIP<sub>1,3</sub>, PIP<sub>1,2O2</sub>, DFOB, and BOB ions at the B3LYP/def2TZVP level of theory. Color code: blue = positive, red = negative.

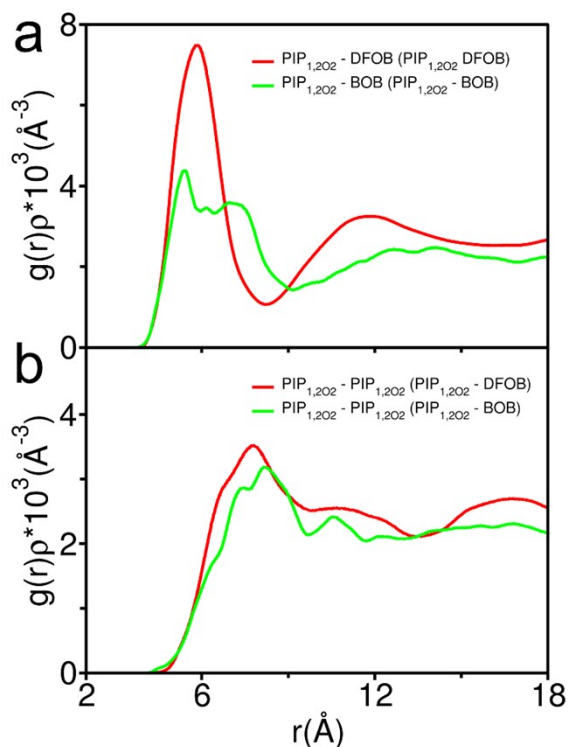

**Fig. S8** Radial distribution functions multiplied by the numerical densities of the observed species,  $g(r)\rho$  's, calculated from the MD simulations for  $\text{PIP}_{1,2\text{O}2}\text{DFOB}$  and  $\text{PIP}_{1,2\text{O}2}\text{BOB}$  between a) the center of mass of  $\text{PIP}_{1,2\text{O}2}$  and the center of mass of the respective anion and b) the center of mass of two cations.

**Table S1** Number of molecules, box dimensions, and densities of the MD simulated systems.

| System                                 | $\text{PIP}_{1,3}$ | $\text{PIP}_{1,2\text{O}2}$ | DFOB | BOB | Box edge (Å) | Density ( $\text{g cm}^{-3}$ ) |
|----------------------------------------|--------------------|-----------------------------|------|-----|--------------|--------------------------------|
| $\text{PIP}_{1,3}\text{DFOB}$          | 339                | 0                           | 339  | 0   | 49.9997      | 1.2569                         |
| $\text{PIP}_{1,2\text{O}2}\text{DFOB}$ | 0                  | 306                         | 306  | 0   | 49.9258      | 1.2625                         |
| $\text{PIP}_{1,2\text{O}2}\text{BOB}$  | 0                  | 270                         | 0    | 279 | 50.0198      | 1.3298                         |

**Table S2** Partial charges calculated using the CHELPG scheme from DFT optimizations at the B3LYP/def2TZVP level of theory for each atom of the two anions, referred to the reported structures.

| DFOB      |        | BOB       |        |
|-----------|--------|-----------|--------|
|           |        |           |        |
| Atom type | Charge | Atom type | Charge |
| B         | 0.943  | B         | 0.786  |
| F         | -0.458 | O         | -0.498 |
| O         | -0.524 | C         | 0.605  |
| C         | 0.589  | O2        | -0.554 |
| O2        | -0.578 |           |        |

**Table S3** Isovalues employed for the SDFs. The same density/maximum ratio was employed for the same observed species in different systems.

| <b>System</b>                  | <b>Reference</b>                       | <b>Observed species</b>     | <b>Isovalues</b> |
|--------------------------------|----------------------------------------|-----------------------------|------------------|
| <b>PIP<sub>1,3</sub>DFOB</b>   | <b>PIP<sub>1,3</sub> (Figure 3a)</b>   | DFOB C.O.M.                 | 8.7              |
|                                |                                        | PIP <sub>1,3</sub> C.O.M.   | 6.6              |
|                                |                                        | O <sub>DFOB</sub>           | 6.8              |
|                                |                                        | F <sub>DFOB</sub>           | 6.0              |
| <b>PIP<sub>1,202</sub>DFOB</b> | <b>PIP<sub>1,202</sub> (Figure 3b)</b> | DFOB C.O.M.                 | 8.9              |
|                                |                                        | PIP <sub>1,202</sub> C.O.M. | 4.5              |
|                                |                                        | O <sub>DFOB</sub>           | 7.7              |
|                                |                                        | F <sub>DFOB</sub>           | 6.2              |
|                                | <b>DFOB (Figure 4a)</b>                | DFOB C.O.M.                 | 4.9              |
|                                |                                        | PIP <sub>1,202</sub> C.O.M. | 7.0              |
|                                |                                        | O <sub>DFOB</sub>           | 4.0              |
|                                |                                        | F <sub>DFOB</sub>           | 3.6              |
| <b>PIP<sub>1,202</sub>BOB</b>  | <b>BOB (Figure 4b)</b>                 | BOB C.O.M.                  | 5.7              |
|                                |                                        | PIP <sub>1,202</sub> C.O.M. | 6.3              |
|                                |                                        | O <sub>BOB</sub>            | 3.9              |
